# Supplementary material for: mTOR Activation in Liver Tumors Is Associated with Metabolic Syndrome and Non-Alcoholic Steatohepatitis in Both Mouse Models and Humans
Source: PubMed Central journal article supplement (PMC6315895; doi:10.3390/cancers10120465), 2018-11-22
Supplement: cancers-10-00465-s001.pdf [file cancers-10-00465-s001.pdf]

# Supplementary Materials: mTOR Activation in Liver Tumors Is Associated with Metabolic Syndrome and Non-Alcoholic Steatohepatitis in Both Mouse Models and Humans

Takahiro Okuno, Anna Kakehashi, Naomi Ishii, Masaki Fujioka, Min Gi and Hideki Wanibuchi

**Table S1.** Incidences and multiplicities of total liver tumors, hepatocellular adenomas, and hepatocellular carcinomas in TSOD- and CDAHFD-fed C57BL/6J mice.

| Age                          | 52 weeks  |           | 60 weeks  |             | 38 weeks  |           | 48 weeks  |             |
|------------------------------|-----------|-----------|-----------|-------------|-----------|-----------|-----------|-------------|
|                              | TSNO      | TSOD      | TSNO      | TSOD        | Control   | CDAHFD    | Control   | CDAHFD      |
| Animals                      |           |           |           |             |           |           |           |             |
| No. of animals <sup>a)</sup> | 5         | 18        | 5         | 16          | 10        | 10        | 8         | 10          |
| Liver tumors (HCC + HCA)     |           |           |           |             |           |           |           |             |
| Incidence (%)                | 1 (20)    | 11 (61)   | 0 (0)     | 13 (81) *   | 0         | 5 (50) *  | 0         | 8 (80) *    |
| Multiplicity (No./mouse)     | 0.2 ± 0.4 | 1.0 ± 1.0 | 0.0 ± 0.0 | 1.8 ± 1.3 * | 0.0 ± 0.0 | 1.2 ± 1.9 | 0.0 ± 0.0 | 2.2 ± 1.4 * |
| HCA                          |           |           |           |             |           |           |           |             |
| Incidence (%)                | 0 (0)     | 8 (44)    | 0 (0)     | 8 (50)      | 0         | 5 (50) *  | 0         | 8 (80) *    |
| Multiplicity (no./mouse)     | 0.0 ± 0.0 | 0.5 ± 0.6 | 0.0 ± 0.0 | 0.6 ± 0.6   | 0.0 ± 0.0 | 1.1 ± 1.7 | 0.0 ± 0.0 | 2.2 ± 1.4 * |
| HCC                          |           |           |           |             |           |           |           |             |
| Incidence (%)                | 1 (20)    | 6 (33)    | 0 (0)     | 10 (63) *   | 0         | 1 (10)    | 0         | 0 (0)       |
| Multiplicity (No./mouse)     | 0.2 ± 0.4 | 0.5 ± 0.9 | 0.0 ± 0.0 | 1.3 ± 1.3   | 0.0 ± 0.0 | 0.1 ± 0.3 | 0.0 ± 0.0 | 0.0 ± 0.0   |

HCC, hepatocellular carcinoma; HCA, hepatocellular adenoma; \*  $p < 0.05$ , as compared to the control. <sup>a</sup> Final number of survived animals subjected to the analysis.

**Table S2.** Clinicopathological characteristics of patients with hepatocellular carcinomas.

|                                      | <b>Metabolic Syndrome/NASH-Associated<br/>HCCs</b> | <b>Virus-Associated<br/>HCCs</b> |
|--------------------------------------|----------------------------------------------------|----------------------------------|
| age (years)                          | 51–82 (mean 71.8)                                  | 21–83 (mean 64.6)                |
| sex                                  |                                                    |                                  |
| male                                 | 37 (80%)                                           | 17 (55%)                         |
| female                               | 9 (20%)                                            | 14 (45%)                         |
| complications                        |                                                    |                                  |
| obesity                              | 24 (52%)                                           | 0                                |
| diabetes                             | 32 (70%)                                           | 0                                |
| dyslipidemia                         | 19 (41%)                                           | 0                                |
| hypertension                         | 38 (83%)                                           | 0                                |
| hepatitis B virus infection          | 0                                                  | 11 (35%)                         |
| hepatitis C virus infection          | 0                                                  | 20 (65%)                         |
| differentiation of HCC               |                                                    |                                  |
| well-differentiated                  | 8 (17%)                                            | 6 (19%)                          |
| moderately differentiated            | 27 (59%)                                           | 19 (62%)                         |
| poorly differentiated                | 11 (24%)                                           | 6 (19%)                          |
| fibrosis of liver                    |                                                    |                                  |
| no fibrosis                          | 1 (2%)                                             | 0                                |
| fibrous portal expansion             | 16 (36%)                                           | 9 (29%)                          |
| bridging fibrosis                    | 15 (33%)                                           | 17 (55%)                         |
| cirrhosis                            | 13 (29%)                                           | 5 (16%)                          |
| NASH histology                       |                                                    |                                  |
| confirmed by biopsy                  | 2 (4%)                                             | -                                |
| confirmed with surgical<br>specimens | 15 (33%)                                           | -                                |
